# Supplementary material
Source: bioRxiv or medRxiv preprint supplement (https://medrxiv.org/highwire/filestream/80649/field_highwire_adjunct_files/0/2020.05.08.20095943-1.pdf)
Supplement: Supplementary file [file 2020.05.08.20095943-1.pdf]

## Appendix 1

### *Education attainment and marital status*

In Ecuador, the results of the demographic survey (n = 856) show that 0.7% (n = 6) of COVID-19 patients had not completed their elementary school, 1.9% (n = 16) reported a complete elementary school education, 5.8% (n = 50) had not completed their high school education and 22.5% (n = 193) had completed their entire high school cycle. At least 6.8% (n = 58) are technicians, 46.3% (n = 396) have completed their undergraduate degree and 16.0% (n = 137) have formal postgraduate training. In terms of civil status 39.3% (n = 336) are single, 38% (n = 327) are married, 13% (n = 114) are cohabitating with their partners, 5.4% are divorced (n = 46), 1.3% widows (n = 11) and other responses 3% (n = 22).

### *Result by region and elevation*

In Ecuador, the coastal region has a higher attack rate of 36.1 per 100,000 [CI 95%: 24.1 - 48.2], than the highlands 21.2 per 100,000 [CI 95%: 16.5 - 25.9]. The Amazon region has an attack rate of 22.7 per 100,000 [CI 95%: 9.9 - 35.5] and the Galapagos Islands 139.7 per 100,000 [CI 95%: 27.9 - 251.5]. The coastal region had a crude mortality rate of 2.84 per 100,000 [CI 95%: 1.8 - 3.8], the highlands 2.60 per 100,000 [CI 95%: 1.6 - 3.5] and the Amazon region 1 per 100,000 [CI 95%: -0.42 - 2.3].

When considering altitude (< 2,500 meters versus ≥ 2,500 meters) per canton, we found that cantons located at higher altitudes have lower attack rates (20.3 per 100,000 [CI 95%: 14.4 - 26.3]) than those located below 2,500 m (33.3 per 100,000 [CI 95%: 25.1 - 41.5]). This difference is statistically significant according to a t-test at 0.05% significance level (mean difference 12.95 ± 5.08 p value: 0.018 [CI95% 22.9 - 2.90]).

In terms of mortality, those cantons at higher altitude have a lower crude mortality rate with 4.8 per 100,000 [2.7 - 6.9] versus those located at lower altitude 5.14 per 100,000 [CI 95% 3.9 - 6.3] although the difference not statistically significant according to a t-test at 0.05% significance level (mean difference 0.16 ± 0.76 p value: 0.82 [CI95% -1.36 - 1.69]).
